# Supplementary material for: What are Juvenile-onset systemic sclerosis providers thoughts, experiences, and reasons for autologous stem cell transplant? Result of a multinational survey
Source: PubMed Central journal article supplement (PMC11559529; doi:10.1177/23971983241293297), 2024-11-08
Supplement: sj-pdf-1-jso-10.1177_23971983241293297.pdf [file sj-pdf-1-jso-10.1177_23971983241293297.pdf]

**Supplementary Table A:** Survey Questions 1-11 with answer choices

| Question                                                                                                                   | Answer Choices                                                                                                                                                                                                                                  |
|----------------------------------------------------------------------------------------------------------------------------|-------------------------------------------------------------------------------------------------------------------------------------------------------------------------------------------------------------------------------------------------|
| 1. Do you agree to participate?                                                                                            | -Yes<br>-No                                                                                                                                                                                                                                     |
| 2. How many patients with JSSc do you follow in your current practice?                                                     | - 0<br>- 1-2<br>- 3-5<br>- 6-10<br>- 11-20<br>- >20                                                                                                                                                                                             |
| 3. What best describes your practice type?                                                                                 | -Academic (e.g. University affiliated)<br>-Non-Academic & Non-private (e.g., government)<br>-Private Practice<br>-Other                                                                                                                         |
| 4. Please select the general location of your practice?                                                                    | -Africa<br>-Asia<br>-Australia<br>-Europe<br>-North America<br>-South America                                                                                                                                                                   |
| 5. What best describes your healthcare facility with regards to seeing pediatric patients?                                 | -Pediatric practice<br>-Adult practice<br>-Both pediatric and adult practice<br>-I don't see any pediatric patients                                                                                                                             |
| 6. What best describes your specialty?                                                                                     | -Pediatric Rheumatologist<br>- Other Pediatric Subspecialist<br>-Adult Rheumatologist<br>-Other Adult Subspecialist<br>-Other                                                                                                                   |
| 7. Does your practice or healthcare system perform <u>ASCT for any condition or age</u> ?                                  | -Yes<br>-No                                                                                                                                                                                                                                     |
| 8. Does your healthcare system or practice provide ASCT for Systemic Sclerosis?                                            | -No<br>-jSSc only<br>-adult SSc only<br>-both jSSc & adult-SSc                                                                                                                                                                                  |
| 9. Do you provide care for any jSSc patients who have received an ASCT ? (the ASCT could have been done at another center) | -Yes<br>-No                                                                                                                                                                                                                                     |
| 10. Have you ever considered ASCT for a jSSc patient?                                                                      | -Yes<br>-No                                                                                                                                                                                                                                     |
| 11. Have your ever referred a jSSc patient for an ASCT?                                                                    | -Yes<br>-No, but I would refer if I had a patient that I thought would benefit or if there was an ASCT center I could refer patients to<br>-No, I would NOT refer because I do not think ASCT is an appropriate therapeutic option at this time |
