# Supplementary material for: What are Juvenile-onset systemic sclerosis providers thoughts, experiences, and reasons for autologous stem cell transplant? Result of a multinational survey
Source: PubMed Central journal article supplement (PMC11559529; doi:10.1177/23971983241293297), 2024-11-08
Supplement: sj-pdf-2-jso-10.1177_23971983241293297.pdf [file sj-pdf-2-jso-10.1177_23971983241293297.pdf]

**Supplementary Table B:** Survey questions relating to reasons/indications for ASCT in jSSc

| Question                                                                                                                                                                                                                                                | Answer Choices                                                                                                                                                                                                                                                                                                          |
|---------------------------------------------------------------------------------------------------------------------------------------------------------------------------------------------------------------------------------------------------------|-------------------------------------------------------------------------------------------------------------------------------------------------------------------------------------------------------------------------------------------------------------------------------------------------------------------------|
| <p>12. Please think about the reasons you would refer a JSSc patient for ASCT.<br/>DMARD= disease modifying anti-rheumatic drugs. Check all that apply.</p> <p><i>*only asked if has referred or would consider referring for ASCT (Q11) (N=29)</i></p> | <ul style="list-style-type: none"> <li>-Slowly progressive jSSc (despite DMARD therapy)</li> <li>-Rapidly progressive jSSc (despite DMARD therapy)</li> <li>-Severe jSSc disease status</li> <li>-Age of jSSc patient</li> <li>-Parental/caregiver preference</li> <li>-Severe impairment of quality of life</li> </ul> |
| <p>13. Please rank the importance of each indication for referral to ASCT (1=most important)</p> <p><i>*only answer choices selected in question 12 available (N=23)</i></p>                                                                            | <ul style="list-style-type: none"> <li>-Slowly progressive jSSc (despite DMARD therapy)</li> <li>-Rapidly progressive jSSc (despite DMARD therapy)</li> <li>-Severe jSSc disease status</li> <li>-Age of jSSc patient</li> <li>-Parental/caregiver preference</li> <li>-Severe impairment of quality of life</li> </ul> |
| <p>14. Do you think DMARD(s) should be tried first, prior to considering a referral for ASCT?</p> <p><i>*only asked if has referred or consider referring for ASCT (Q11) (N=29)</i></p>                                                                 | <ul style="list-style-type: none"> <li>-Yes</li> <li>-No</li> </ul>                                                                                                                                                                                                                                                     |
| <p>15. How many DMARD(s) should be tried prior to referring for ASCT?</p> <p><i>*only asked if Q14 was yes (N=28)</i></p>                                                                                                                               | <ul style="list-style-type: none"> <li>- 1</li> <li>- 2-3</li> <li>- 3-4</li> <li>- 5 or more</li> </ul>                                                                                                                                                                                                                |
| <p>16. Please review the list of DMARDS below. Failure of which DMARD(s) would be consideration for referring for ASCT? (check all that apply)</p> <p><i>*only asked if Q14 was yes. (N=28)</i></p>                                                     | <ul style="list-style-type: none"> <li>-Methotrexate</li> <li>-Mycophenolate</li> <li>-Cyclophosphamide</li> <li>-Rituximab</li> <li>-Tocilizumab</li> <li>-Imatinab</li> <li>-Abatacept</li> <li>-JAK inhibitor</li> <li>-Other not listed</li> </ul>                                                                  |
| <p>17. For evidence of disease progression, what time interval is most important when considering referral for ASCT?</p> <p><i>*only asked if Q13 indicated ASCT for slow or rapid progressive disease despite DMARD (N=26)</i></p>                     | <ul style="list-style-type: none"> <li>- 1-3 months</li> <li>- 3-6 months</li> <li>- 6-12 months</li> <li>- 12-24 months</li> </ul>                                                                                                                                                                                     |
| <p>18. Disease of which organ system(s) would be consideration for jSSc referral for ASCT? Check all that apply</p> <p><i>*only asked if respondents answered yes to referring or considering referral for ASCT. (N=29)</i></p>                         | <ul style="list-style-type: none"> <li>-Skin</li> <li>-Pulmonary</li> <li>-Gastrointestinal</li> <li>-Musculoskeletal</li> <li>-Cardiac</li> <li>-Vascular</li> </ul>                                                                                                                                                   |

19. Rank the order of organ system involvement that would prompt a referral for ASCT in a jSSc patient.

1=most important

*\*only asked if respondents were asked question #18, and only organ systems selected in Q18 were displayed. (n=29)*

-Skin

-Pulmonary

-Gastrointestinal

-Musculoskeletal

-Cardiac

-Vascular

\*denotes questions that utilized branching logic and may not have been asked of all respondents.
