# Supplementary material for: What are Juvenile-onset systemic sclerosis providers thoughts, experiences, and reasons for autologous stem cell transplant? Result of a multinational survey
Source: PubMed Central journal article supplement (PMC11559529; doi:10.1177/23971983241293297), 2024-11-08
Supplement: sj-pdf-3-jso-10.1177_23971983241293297.pdf [file sj-pdf-3-jso-10.1177_23971983241293297.pdf]

**Supplementary Table C: JSSc skin-specific organ involvement questions**

| Question                                                                                                                                                                                                                                                                                | Answer                                                                              | N (%)                     |
|-----------------------------------------------------------------------------------------------------------------------------------------------------------------------------------------------------------------------------------------------------------------------------------------|-------------------------------------------------------------------------------------|---------------------------|
| 20. For skin disease, choose the reasons that you would consider referral for ASCT. The skin reasons could indicate severe disease, progressive disease, and/or severe quality of life impairment (check all that apply) ( <i>N=19</i> )                                                | -Skin thickening                                                                    | 18 (95%)                  |
|                                                                                                                                                                                                                                                                                         | -Calcinosis                                                                         | 11 (57%)                  |
|                                                                                                                                                                                                                                                                                         | -Non-vascular ulcers                                                                | 11 (57%)                  |
|                                                                                                                                                                                                                                                                                         | -Oral/facial dysfunction                                                            | 12 (63%)                  |
|                                                                                                                                                                                                                                                                                         | -Other- not listed (list)                                                           | 3 (16%)<br>(contractures) |
| 21. For skin disease, please rank your reasons that you would consider referral for ASCT. The skin reasons could indicate severe disease, progressive disease, and/or severe quality of life impairment. ( <i>N=13</i> )<br><i>*only answers selected in Q20 were available to rank</i> |                                                                                     | <b>Ranked #1</b>          |
|                                                                                                                                                                                                                                                                                         | -Skin thickening                                                                    | 8 (62%)                   |
|                                                                                                                                                                                                                                                                                         | -Calcinosis                                                                         | 2 (15%)                   |
|                                                                                                                                                                                                                                                                                         | -Non-vascular ulcers                                                                | 3 (23%)                   |
|                                                                                                                                                                                                                                                                                         | -Oral/facial dysfunction                                                            | 0 (0%)                    |
|                                                                                                                                                                                                                                                                                         | -Other- not listed                                                                  | 0 (0%)                    |
| 22. For skin thickening as measured by modified Rodnan Skin Score (mRSS), which would you consider to be an indication for referral for ASCT? ( <i>N=19</i> )                                                                                                                           | -High mRSS only                                                                     | 0 (0%)                    |
|                                                                                                                                                                                                                                                                                         | -Progressive worsening of mRSS only                                                 | 2 (11%)<br>17 (89%)       |
|                                                                                                                                                                                                                                                                                         | -Both high or progressive worsening of mRSS                                         | 0 (%)                     |
|                                                                                                                                                                                                                                                                                         | -None-mRSS is not important                                                         |                           |
| 22. Would you refer for ASCT only because of skin disease severity or progressive worsening? ( <i>N=19</i> )                                                                                                                                                                            | -Yes                                                                                | 10 (53%)                  |
|                                                                                                                                                                                                                                                                                         | -No- would also need to have other organ system(s) with severe or worsening disease | 9 (47%)                   |
| These questions were only provided to the 19 respondents who selected skin as organ system involvement which would be a consideration for jSSc referral for ASCT (Question 18).                                                                                                         |                                                                                     |                           |
