# Supplementary material for: What are Juvenile-onset systemic sclerosis providers thoughts, experiences, and reasons for autologous stem cell transplant? Result of a multinational survey
Source: PubMed Central journal article supplement (PMC11559529; doi:10.1177/23971983241293297), 2024-11-08
Supplement: sj-pdf-4-jso-10.1177_23971983241293297.pdf [file sj-pdf-4-jso-10.1177_23971983241293297.pdf]

**Supplementary Table D: JSSc pulmonary-specific organ involvement questions**

| Question                                                                                                                                                                                                                    | Answer                                                                               | N (%)    |
|-----------------------------------------------------------------------------------------------------------------------------------------------------------------------------------------------------------------------------|--------------------------------------------------------------------------------------|----------|
| 23. For pulmonary disease, please select your reasons that you would consider referral for ASCT. The pulmonary reasons could indicate severe disease, progressive disease, and/or severe quality of life impairment. (N=28) | - Interstitial lung disease only                                                     | 15 (54%) |
|                                                                                                                                                                                                                             | -Respiratory muscle weakness only                                                    | 0 (0%)   |
|                                                                                                                                                                                                                             | -Both interstitial lung disease or respiratory muscle weakness                       | 13 (46%) |
|                                                                                                                                                                                                                             | - Other- not listed                                                                  | 0 (0%)   |
| 24. For pulmonary disease as measured by forced vital capacity (FVC), which would you consider to be an indication for referral to ASCT? (N=28)                                                                             | -Low FVC only                                                                        | 0 (0%)   |
|                                                                                                                                                                                                                             | -Progressive worsening of FVC only                                                   | 6 (21%)  |
|                                                                                                                                                                                                                             | -Both low FVC or progressive worsening of FVC                                        | 21 (75%) |
|                                                                                                                                                                                                                             | -None- FVC is not important or is not readily available in my area                   | 1 (4%)   |
| 25. For pulmonary disease as measured by chest CT scan, which would you consider to be an indication for referral to ASCT? (N=29)                                                                                           | -Extensive lung involvement on CT chest only                                         | 0 (0%)   |
|                                                                                                                                                                                                                             | -Progressive worsening on CT chest only                                              | 4 (14%)  |
|                                                                                                                                                                                                                             | -Both extensive involvement or progressive worsening on CT chest                     | 25 (86%) |
|                                                                                                                                                                                                                             | -None- CT chest is not important or is not readily available in my area.             | 0 (0%)   |
| 26. Would you refer for ASCT only because of lung disease severity, progressive worsening, or severe impairment of quality of life? (N=29)                                                                                  | Yes                                                                                  | 27 (93%) |
|                                                                                                                                                                                                                             | -No- would also need to have other organ systems(s) with severe or worsening disease | 2 (7%)   |
| These questions were provided to the 29 respondents who selected pulmonary as organ system involvement which would be a consideration for jSSc referral for ASCT (Question 18).                                             |                                                                                      |          |
