# Supplementary material for: What are Juvenile-onset systemic sclerosis providers thoughts, experiences, and reasons for autologous stem cell transplant? Result of a multinational survey
Source: PubMed Central journal article supplement (PMC11559529; doi:10.1177/23971983241293297), 2024-11-08
Supplement: sj-pdf-5-jso-10.1177_23971983241293297.pdf [file sj-pdf-5-jso-10.1177_23971983241293297.pdf]

**Supplementary Table E: JSSc gastrointestinal specific organ involvement questions**

| Question                                                                                                                                                                                                                                           | Answer                                            | N (%)                      |
|----------------------------------------------------------------------------------------------------------------------------------------------------------------------------------------------------------------------------------------------------|---------------------------------------------------|----------------------------|
| 27. For gastrointestinal disease, please choose the reasons that you would consider referral for ASCT. The GI reasons could indicate severe disease, progressive disease, and/or severe quality of life impairment. (check all that apply). (N=21) | - Esophageal dysfunction                          | 13 (62%)                   |
|                                                                                                                                                                                                                                                    | - Gastroparesis/delayed gastric emptying          | 13 (62%)                   |
|                                                                                                                                                                                                                                                    | - Intestinal dysmotility                          | 11 (52%)                   |
|                                                                                                                                                                                                                                                    | - Growth failure/nutritional failure/malnutrition | 19 (90%)                   |
|                                                                                                                                                                                                                                                    | - Total parenteral nutrition (TPN) dependence     | 18 (86%)                   |
|                                                                                                                                                                                                                                                    | - Other- not listed                               | 1 (5%)                     |
|                                                                                                                                                                                                                                                    |                                                   | (Progressive decrease BMI) |
| 28. For gastrointestinal disease, please rank the reasons that you would consider referral for ASCT. (check all that apply). <i>*only selected answers in Q27 were available for ranking. (N=16)</i>                                               |                                                   | <b>Ranked #1</b>           |
|                                                                                                                                                                                                                                                    | - Esophageal dysfunction                          | 4 (25%)                    |
|                                                                                                                                                                                                                                                    | - Gastroparesis/delayed gastric emptying          | 0 (0%)                     |
|                                                                                                                                                                                                                                                    | - Intestinal dysmotility                          | 0 (0%)                     |
|                                                                                                                                                                                                                                                    | - Growth failure/nutritional failure/malnutrition | 6 (38%)                    |
|                                                                                                                                                                                                                                                    | - Total parenteral nutrition (TPM) dependence     | 6 (38%)                    |
|                                                                                                                                                                                                                                                    | -Other- not listed                                | 0 (0%)                     |
| 29. Would you refer to ASCT only because of GI disease severity, progressive worsening, or severe impairment of quality of life? (N=21)                                                                                                            | Yes                                               | 11 (52%)                   |
|                                                                                                                                                                                                                                                    | No                                                | 10 (48%)                   |
| These questions were only provided to the 21 respondents who selected gastrointestinal as organ system involvement which would be a consideration for jSSc referral for ASCT (Question 18).                                                        |                                                   |                            |
