# Supplementary material for: What are Juvenile-onset systemic sclerosis providers thoughts, experiences, and reasons for autologous stem cell transplant? Result of a multinational survey
Source: PubMed Central journal article supplement (PMC11559529; doi:10.1177/23971983241293297), 2024-11-08
Supplement: sj-pdf-6-jso-10.1177_23971983241293297.pdf [file sj-pdf-6-jso-10.1177_23971983241293297.pdf]

**Supplementary Table F: JSSc cardiovascular-specific organ involvement questions**

| Question                                                                                                                                                                                                                                                                                            | Answer                                                                                | N (%)        |
|-----------------------------------------------------------------------------------------------------------------------------------------------------------------------------------------------------------------------------------------------------------------------------------------------------|---------------------------------------------------------------------------------------|--------------|
| 30. For cardiovascular disease, please chose the reasons that you would consider referral for ASCT. The cardiovascular reasons could indicate severe disease, progressive disease, and/or severe quality of life impairment. <i>(Check all that apply) (N=27)</i>                                   | - Pulmonary Hypertension                                                              | 23 (85%)     |
|                                                                                                                                                                                                                                                                                                     | - Cardiac rhythm abnormalities                                                        | 18 (67%)     |
|                                                                                                                                                                                                                                                                                                     | - Myocarditis/myopathy                                                                | 25 (93%)     |
|                                                                                                                                                                                                                                                                                                     | - Cardiac Failure                                                                     | 20 (74%)     |
|                                                                                                                                                                                                                                                                                                     | - Other- not listed                                                                   | 1 (4%) ( - ) |
| 31. For cardiovascular disease, please rank the reasons that you would consider referral for ASCT. The cardiovascular reasons could indicate severe disease, progressive disease, and/or severe quality of life impairment. <i>*only selected answers in Q30 were available for ranking. (N=18)</i> | - Pulmonary Hypertension                                                              | 5 (28%)      |
|                                                                                                                                                                                                                                                                                                     | - Cardiac rhythm abnormalities                                                        | 0 (0%)       |
|                                                                                                                                                                                                                                                                                                     | - Myocarditis/myopathy                                                                | 6 (33%)      |
|                                                                                                                                                                                                                                                                                                     | - Cardiac Failure                                                                     | 7 (39%)      |
|                                                                                                                                                                                                                                                                                                     | - Other- not listed                                                                   | 0 (0%)       |
| 32. Would you refer to ASCT only because of cardiac disease severity, progressive worsening, or severe impairment of quality of life? <i>(N=27)</i>                                                                                                                                                 | - Yes                                                                                 | 24 (89%)     |
|                                                                                                                                                                                                                                                                                                     | - No – would also need to have other organ system(s) with severe or worsening disease | 3 (11%)      |
| These questions were only provided to the 27 respondents who selected cardiac as organ system involvement which would be a consideration for jSSc referral for ASCT (Question 18).                                                                                                                  |                                                                                       |              |
