# Supplementary material for: What are Juvenile-onset systemic sclerosis providers thoughts, experiences, and reasons for autologous stem cell transplant? Result of a multinational survey
Source: PubMed Central journal article supplement (PMC11559529; doi:10.1177/23971983241293297), 2024-11-08
Supplement: sj-pdf-7-jso-10.1177_23971983241293297.pdf [file sj-pdf-7-jso-10.1177_23971983241293297.pdf]

**Supplementary Table G: JSSc musculoskeletal specific organ involvement questions**

| Question                                                                                                                                                                                                                                                                                                              | Answer                                                                                | N (%)            |
|-----------------------------------------------------------------------------------------------------------------------------------------------------------------------------------------------------------------------------------------------------------------------------------------------------------------------|---------------------------------------------------------------------------------------|------------------|
| 33. For musculoskeletal (MSK) disease, please chose the reasons that you would consider referral for ASCT. The MSK reasons could indicate severe disease, progressive disease, and/or severe quality of life impairment. (Check all that apply) (N=8)                                                                 | - Tenosynovitis                                                                       | 4 (50%)          |
|                                                                                                                                                                                                                                                                                                                       | - Myositis                                                                            | 5 (63%)          |
|                                                                                                                                                                                                                                                                                                                       | - Muscle weakness/myopathy                                                            | 5 (63%)          |
|                                                                                                                                                                                                                                                                                                                       | - Respiratory muscle weakness                                                         | 8 (100%)         |
|                                                                                                                                                                                                                                                                                                                       | - Other- not listed                                                                   | 0 (0%)           |
| 34. For musculoskeletal (MSK) disease, please rank the reasons that you would consider referral for ASCT. The MSK reasons could indicate severe disease, progressive disease, and/or severe quality of life impairment. (Check all that apply) <i>*only selected answers in Q33 were available for ranking. (N=7)</i> |                                                                                       | <b>Ranked #1</b> |
|                                                                                                                                                                                                                                                                                                                       | - Tenosynovitis                                                                       | 0 (0%)           |
|                                                                                                                                                                                                                                                                                                                       | - Myositis                                                                            | 2 (29%)          |
|                                                                                                                                                                                                                                                                                                                       | - Muscle weakness/myopathy                                                            | 1 (14%)          |
|                                                                                                                                                                                                                                                                                                                       | - Respiratory muscle weakness                                                         | 4 (57%)          |
| - Other- not listed                                                                                                                                                                                                                                                                                                   | 0 (0%)                                                                                |                  |
| 35. Would you refer to ASCT only because of MSK disease severity, progressive worsening, or severe impairment of quality of life? (N=8)                                                                                                                                                                               | - Yes                                                                                 | 3 (38%)          |
|                                                                                                                                                                                                                                                                                                                       | - No – would also need to have other organ system(s) with severe or worsening disease | 5 (62%)          |
| These questions were only provided to the 8 respondents who selected musculoskeletal as organ system involvement which would be a consideration for jSSc referral for ASCT (Question 18).                                                                                                                             |                                                                                       |                  |
