# Supplementary material for: What are Juvenile-onset systemic sclerosis providers thoughts, experiences, and reasons for autologous stem cell transplant? Result of a multinational survey
Source: PubMed Central journal article supplement (PMC11559529; doi:10.1177/23971983241293297), 2024-11-08
Supplement: sj-pdf-8-jso-10.1177_23971983241293297.pdf [file sj-pdf-8-jso-10.1177_23971983241293297.pdf]

**Supplementary Table H: JSSc vascular specific organ involvement questions**

| Question                                                                                                                                                                                                                                                                                                              | Answer                                                                               | N (%)            |
|-----------------------------------------------------------------------------------------------------------------------------------------------------------------------------------------------------------------------------------------------------------------------------------------------------------------------|--------------------------------------------------------------------------------------|------------------|
| <p>36. For vascular disease, please chose the reasons that you would consider referral for ASCT. The vascular reasons could indicate severe disease, progressive disease, and/or severe quality of life impairment. (Check all that apply) (N=18)</p>                                                                 | - Recurrent digital ulcers (DU)                                                      | 6 (33%)          |
|                                                                                                                                                                                                                                                                                                                       | - Gangrene/ autoamputation                                                           | 15 (83%)         |
|                                                                                                                                                                                                                                                                                                                       | - Need for hospitalization(s) for DU/gangrene management                             | 18 (100%)        |
|                                                                                                                                                                                                                                                                                                                       | - Need for surgical intervention(s) (e.g. sympathectomy, digital block, etc).        | 13 (72%)         |
|                                                                                                                                                                                                                                                                                                                       | - Other-not listed                                                                   | 0 (0%)           |
| <p>37. For vascular disease, please rank the reasons that you would consider referral for ASCT. The vascular reasons could indicate severe disease, progressive disease, and/or severe quality of life impairment. (Check all that apply) <i>*only selected answers in Q36 were available for ranking. (N=11)</i></p> |                                                                                      | <b>Ranked #1</b> |
|                                                                                                                                                                                                                                                                                                                       | - Recurrent digital ulcers (DU)                                                      | 2 (18%)          |
|                                                                                                                                                                                                                                                                                                                       | - Gangrene/ autoamputation                                                           | 5 (45%)          |
|                                                                                                                                                                                                                                                                                                                       | - Need for hospitalization(s) for DU/gangrene management                             | 3 (27%)          |
|                                                                                                                                                                                                                                                                                                                       | - Need for surgical intervention(s) (e.g. sympathectomy, digital block, etc).        | 1 (9%)           |
| - Other-not listed                                                                                                                                                                                                                                                                                                    | 0 (%)                                                                                |                  |
| <p>38. Would you refer to ASCT only because of vascular disease severity, progressive worsening, or severe impairment of quality of life? (N=18)</p>                                                                                                                                                                  | -Yes                                                                                 | 11 (61%)         |
|                                                                                                                                                                                                                                                                                                                       | -No – would also need to have other organ system(s) with severe or worsening disease | 7 (39%)          |
| <p>These questions were only provided to the 18 respondents who selected vascular as organ system involvement which would be a consideration for jSSc referral for ASCT (Question 18).</p>                                                                                                                            |                                                                                      |                  |
